# Supplementary material for: Nifuroxazide suppresses PD-L1 expression and enhances the efficacy of radiotherapy in hepatocellular carcinoma
Source: eLife journal article supplement (doi:10.7554/elife.90911), 2023-09-29
Supplement: fig7-data2 [file elife-90911-fig7-data2-v1.pdf]

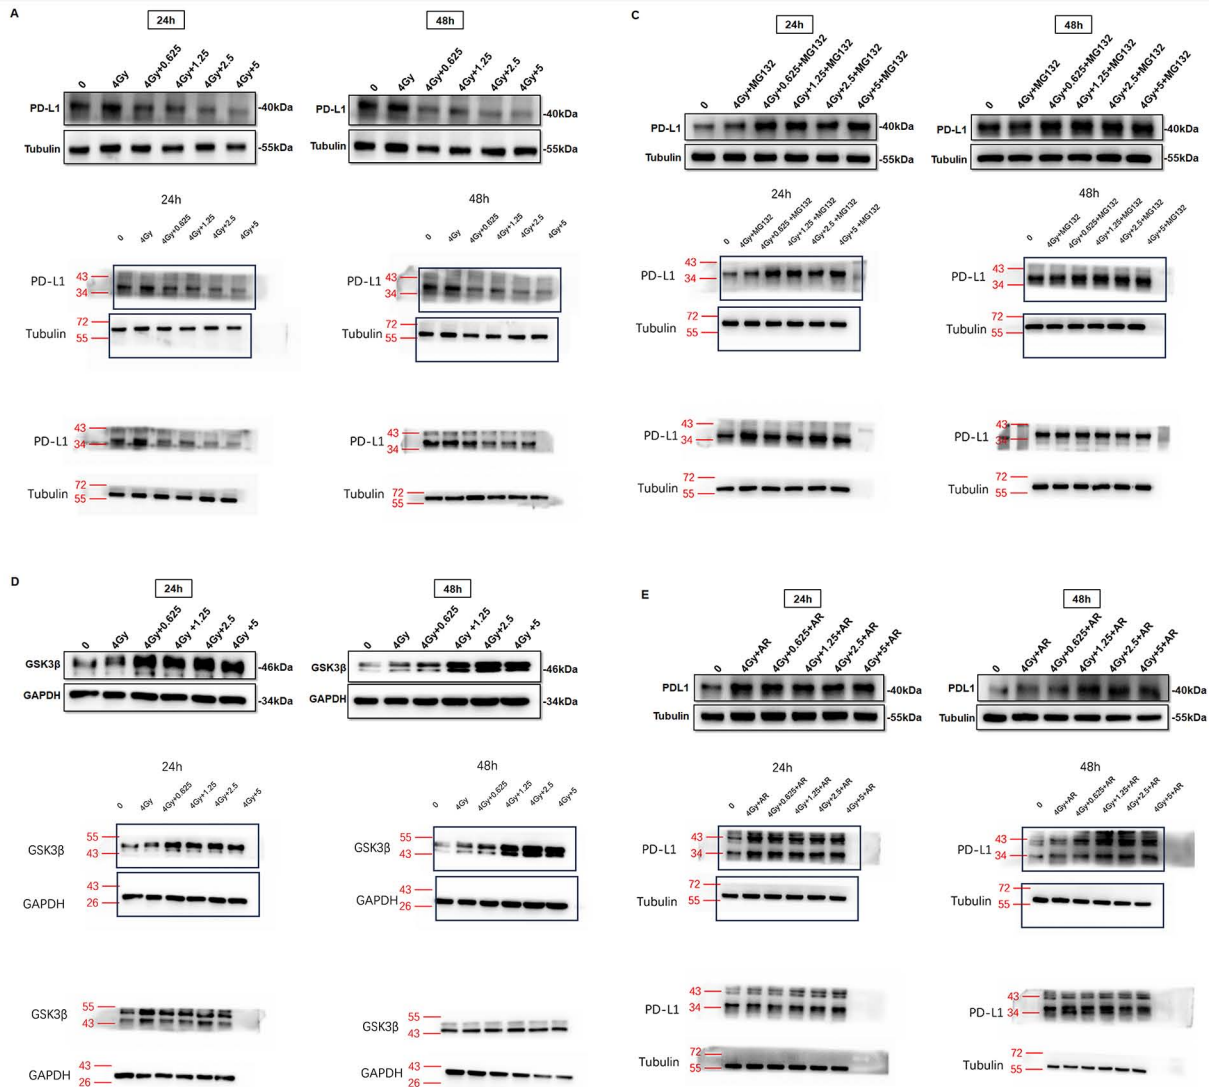

**Figure 7**
